# Supplementary material
Source: publisher figshare collection journal article supplement (https://acs.figshare.com/ndownloader/files/5687487)
Supplement: Supplementary file 1 [file 5687487]

# ic000289l.cif

data_3PF6
#------------------------------------------------------------------------------
_audit_creation_date                  'Tue Jul 21 12:42:30 1998'
_audit_creation_method                'from TEXRAY.INF file'
_audit_update_record                   ?
#------------------------------------------------------------------------------
_computing_data_collection            'MSC/AFC Diffractometer Control'
_computing_cell_refinement            'MSC/AFC Diffractometer Control'
_computing_data_reduction             'teXsan'
_computing_structure_solution         'SHELXS86'
_computing_structure_refinement       'teXsan'
_computing_publication_material       'teXsan'
_computing_molecular_graphics         'teXsan ORTEP'
#------------------------------------------------------------------------------
_chemical_compound_source
' Recrystallized from nitromethane/diethyl ether'
_chemical_name_systematic
;
Bis{1,3-bis(dimethylphosphino)propane}{oxodisulfido(2-)-S,S'}cobalt(III)
hexafluorophosphate
;
_chemical_name_common                  [Co(S~2~O(IP(JS,S')(dmpp)~2~]PF~6~
_chemical_formula_weight               612.35
_chemical_formula_analytical           'C14 H36 Co F6 O P5 S2'
_chemical_formula_sum                  'C14 H36 Co F6 O P5 S2'
_chemical_formula_moiety               'C14 H36 Co O P4 S2 1+, F6 P 1-'
_chemical_formula_structural           '(Co (C7 H18 P2)2 (O S2)) (F6 P)'
_chemical_melting_point                'not measured'
#------------------------------------------------------------------------------
_cell_length_a                         13.652(5)
_cell_length_b                         11.792(3)
_cell_length_c                         16.253(3)
_cell_angle_alpha                      90
_cell_angle_beta                       98.05(2)
_cell_angle_gamma                      90
_cell_volume                           2590(1)
_cell_formula_units_Z                  4
_cell_measurement_temperature          296.2
_cell_measurement_reflns_used          25
_cell_measurement_theta_min            10.3
_cell_measurement_theta_max            12.3
#------------------------------------------------------------------------------
_symmetry_cell_setting                 monoclinic
_symmetry_space_group_name_H-M        'P 21/c'
_symmetry_Int_Tables_number            14
_symmetry_space_group_name_Hall        ?
loop_
_symmetry_equiv_pos_as_xyz
x,y,z
-x,1/2+y,1/2-z
-x,-y,-z
x,1/2-y,1/2+z
#------------------------------------------------------------------------------
_exptl_crystal_description            'prism'
_exptl_crystal_colour                 'red'
_exptl_crystal_size_max                0.620
_exptl_crystal_size_mid                0.300
_exptl_crystal_size_min                0.250
_exptl_crystal_density_diffrn          1.570
_exptl_crystal_density_method         'not measured'
_exptl_crystal_F_000                   1264.00
_exptl_absorpt_coefficient_mu          1.181
_exptl_absorpt_correction_type         integration
_exptl_absorpt_process_details         Coppens_numerical
_exptl_absorpt_correction_T_min        0.690
_exptl_absorpt_correction_T_max        0.783
_exptl_special_details                 none
#------------------------------------------------------------------------------
_diffrn_ambient_temperature            296.2
_diffrn_radiation_wavelength           0.7107
_diffrn_radiation_type                'Mo K\a'
_diffrn_radiation_source              'Rigaku sealed tube'
_diffrn_radiation_monochromator       'graphite'
_diffrn_radiation_detector            'scintillation counter'
_diffrn_measurement_device_type       'Rigaku AFC5S'
_diffrn_measurement_method             \w-2\q

_diffrn_standards_number              3
_diffrn_standards_interval_count      150
_diffrn_standards_decay_%             -4.45
loop_
_diffrn_standard_refln_index_h
_diffrn_standard_refln_index_k
_diffrn_standard_refln_index_l
     -1       1     -2
     -3       0     -4
     -1      -1     -2
_diffrn_reflns_number                  7846
_reflns_number_total                   7559
_reflns_number_gt                      3407
_reflns_observed_expression            'I > 3.0\(I)'
_diffrn_reflns_av_R_equivalents        0.065
_diffrn_reflns_av_sigmaI/netI          0.147
_diffrn_reflns_limit_h_min             0
_diffrn_reflns_limit_h_max             19
_diffrn_reflns_limit_k_min             0
_diffrn_reflns_limit_k_max             16
_diffrn_reflns_limit_l_min             -22
_diffrn_reflns_limit_l_max             22
_diffrn_reflns_theta_min               1.27
_diffrn_reflns_theta_max               30.00
_diffrn_reflns_reduction_process      'Lp corrections applied'
#------------------------------------------------------------------------------
loop_
_atom_type_symbol
_atom_type_description
_atom_type_scat_dispersion_real
_atom_type_scat_imag
_atom_type_scat_source
  'Co' 'Co'   0.349 0.972
;International Tables for Crystallography
(1992, Vol. C, Tables 4.2.6.8 and 6.1.1.1)
;
  'S'  'S'   0.125 0.123
;International Tables for Crystallography
(1992, Vol. C, Tables 4.2.6.8 and 6.1.1.1)
;
  'P'  'P'   0.102 0.094
;International Tables for Crystallography
(1992, Vol. C, Tables 4.2.6.8 and 6.1.1.1)
;
  'F'  'F'   0.017 0.010
;International Tables for Crystallography
(1992, Vol. C, Tables 4.2.6.8 and 6.1.1.1)
;
  'O'  'O'   0.011 0.006
;International Tables for Crystallography
(1992, Vol. C, Tables 4.2.6.8 and 6.1.1.1)
;
  'C'  'C'   0.003 0.002
;International Tables for Crystallography
(1992, Vol. C, Tables 4.2.6.8 and 6.1.1.1)
;
  'H'  'H'   0.000 0.000
;International Tables for Crystallography
(1992, Vol. C, Table 6.1.1.2)
;
#------------------------------------------------------------------------------
loop_
_atom_site_label
_atom_site_type_symbol
_atom_site_fract_x
_atom_site_fract_y
_atom_site_fract_z
_atom_site_U_iso_or_equiv
_atom_site_adp_type
_atom_site_occupancy
_atom_site_calc_flags
_atom_site_refinement_flags
_atom_site_disorder_assembly
_atom_site_disorder_group
 Co     Co 0.20459(7)  0.29371(8)  0.22430(5)  0.0227(2)   Uani 1.00 d . . .
 S(1)   S  0.1439(2)   0.2268(2)   0.3401(1)   0.0374(6)   Uani 1.00 d . . .
 S(2)   S  0.1552(1)   0.3975(2)   0.3300(1)   0.0351(6)   Uani 1.00 d . . .
 P(1)   P  0.3544(1)   0.2750(2)   0.3060(1)   0.0367(6)   Uani 1.00 d . . .
 P(2)   P  0.2682(2)   0.4276(2)   0.1509(1)   0.0358(6)   Uani 1.00 d . . .
 P(3)   P  0.0472(1)   0.3164(2)   0.1526(1)   0.0291(5)   Uani 1.00 d . . .
 P(4)   P  0.2240(1)   0.1294(2)   0.1540(1)   0.0279(5)   Uani 1.00 d . . .
 P(5)   P  0.6593(2)   0.2406(2)   0.0450(2)   0.0553(8)   Uani 1.00 d . . .
 F(1)   F  0.7252(6)   0.1421(7)   0.0789(7)   0.186(4)    Uani 1.00 d . . .
 F(2)   F  0.7550(5)   0.2913(8)   0.0218(6)   0.174(4)    Uani 1.00 d . . .
 F(3)   F  0.6844(7)   0.294(1)    0.1258(7)   0.280(7)    Uani 1.00 d . . .
 F(4)   F  0.5618(6)   0.2010(9)   0.0704(6)   0.187(5)    Uani 1.00 d . . .
 F(5)   F  0.6310(7)   0.174(1)    -0.0300(7)  0.276(7)    Uani 1.00 d . . .
 F(6)   F  0.6008(6)   0.3388(8)   0.0073(8)   0.236(5)    Uani 1.00 d . . .
 O      O  0.0580(4)   0.4558(4)   0.3144(3)   0.047(2)    Uani 1.00 d . . .
 C(1)   C  0.3801(6)   0.1400(7)   0.3592(5)   0.053(3)    Uani 1.00 d . . .
 C(2)   C  0.3768(6)   0.3713(8)   0.3952(5)   0.060(3)    Uani 1.00 d . . .
 C(3)   C  0.4674(5)   0.2965(8)   0.2602(5)   0.053(3)    Uani 1.00 d . . .
 C(4)   C  0.4734(6)   0.4073(9)   0.2155(6)   0.070(4)    Uani 1.00 d . . .
 C(5)   C  0.3991(6)   0.4166(8)   0.1375(5)   0.056(3)    Uani 1.00 d . . .
 C(6)   C  0.2577(7)   0.5704(7)   0.1915(5)   0.063(3)    Uani 1.00 d . . .
 C(7)   C  0.2175(7)   0.4459(7)   0.0411(5)   0.057(3)    Uani 1.00 d . . .
 C(8)   C  -0.0012(6)  0.4600(7)   0.1329(5)   0.049(3)    Uani 1.00 d . . .
 C(9)   C  -0.0492(5)  0.2497(7)   0.2031(5)   0.045(2)    Uani 1.00 d . . .
 C(10)  C  0.0203(5)   0.2576(7)   0.0476(4)   0.039(2)    Uani 1.00 d . . .
 C(11)  C  0.0454(6)   0.1335(7)   0.0397(4)   0.043(2)    Uani 1.00 d . . .
 C(12)  C  0.1552(6)   0.1119(7)   0.0493(4)   0.038(2)    Uani 1.00 d . . .
 C(13)  C  0.1843(6)   0.0026(6)   0.2055(5)   0.046(3)    Uani 1.00 d . . .
 C(14)  C  0.3458(6)   0.0882(7)   0.1307(5)   0.047(3)    Uani 1.00 d . . .
 H(1)   H  0.3742      0.0846      0.3234      0.0623      Uiso 1.00 d . . .
 H(2)   H  0.3338      0.1057      0.3980      0.0623      Uiso 1.00 d . . .
 H(3)   H  0.4561      0.1354      0.3839      0.0623      Uiso 1.00 d . . .
 H(4)   H  0.3300      0.3477      0.4345      0.0706      Uiso 1.00 d . . .
 H(5)   H  0.3837      0.4346      0.3742      0.0706      Uiso 1.00 d . . .
 H(6)   H  0.4469      0.3764      0.4209      0.0706      Uiso 1.00 d . . .
 H(7)   H  0.5232      0.2850      0.3029      0.0667      Uiso 1.00 d . . .
 H(8)   H  0.4840      0.2504      0.2273      0.0667      Uiso 1.00 d . . .
 H(9)   H  0.5357      0.4073      0.1932      0.0805      Uiso 1.00 d . . .
 H(10)  H  0.4644      0.4817      0.2533      0.0805      Uiso 1.00 d . . .
 H(11)  H  0.4055      0.3637      0.1084      0.0661      Uiso 1.00 d . . .
 H(12)  H  0.4167      0.4858      0.1165      0.0661      Uiso 1.00 d . . .
 H(13)  H  0.2813      0.5761      0.2442      0.0743      Uiso 1.00 d . . .
 H(14)  H  0.3047      0.6078      0.1732      0.0743      Uiso 1.00 d . . .
 H(15)  H  0.1764      0.5982      0.1784      0.0743      Uiso 1.00 d . . .
 H(16)  H  0.2622      0.4856      0.0177      0.0664      Uiso 1.00 d . . .
 H(17)  H  0.2204      0.3929      0.0163      0.0664      Uiso 1.00 d . . .
 H(18)  H  0.1351      0.4699      0.0287      0.0664      Uiso 1.00 d . . .
 H(19)  H  0.0080      0.5001      0.1863      0.0571      Uiso 1.00 d . . .
 H(20)  H  0.0332      0.5010      0.1071      0.0571      Uiso 1.00 d . . .
 H(21)  H  -0.0622     0.4624      0.1130      0.0571      Uiso 1.00 d . . .
 H(22)  H  -0.0548     0.2886      0.2589      0.0486      Uiso 1.00 d . . .
 H(23)  H  -0.0305     0.1708      0.2066      0.0486      Uiso 1.00 d . . .
 H(24)  H  -0.0914     0.2716      0.1776      0.0486      Uiso 1.00 d . . .
 H(25)  H  -0.0460     0.2700      0.0358      0.0461      Uiso 1.00 d . . .
 H(26)  H  0.0521      0.3063      0.0083      0.0461      Uiso 1.00 d . . .
 H(27)  H  0.0204      0.1076      -0.0035     0.0531      Uiso 1.00 d . . .
 H(28)  H  0.0066      0.0804      0.0775      0.0531      Uiso 1.00 d . . .
 H(29)  H  0.1626      0.0376      0.0363      0.0486      Uiso 1.00 d . . .
 H(30)  H  0.1924      0.1511      0.0139      0.0486      Uiso 1.00 d . . .
 H(31)  H  0.1061      0.0032      0.2091      0.0559      Uiso 1.00 d . . .
 H(32)  H  0.2334      -0.0106     0.2619      0.0559      Uiso 1.00 d . . .
 H(33)  H  0.1779      -0.0530     0.1713      0.0559      Uiso 1.00 d . . .
 H(34)  H  0.3471      0.0424      0.0958      0.0545      Uiso 1.00 d . . .
 H(35)  H  0.3894      0.0620      0.1770      0.0545      Uiso 1.00 d . . .
 H(36)  H  0.3787      0.1424      0.1033      0.0545      Uiso 1.00 d . . .

loop_
_atom_site_aniso_label
_atom_site_aniso_U_11
_atom_site_aniso_U_22
_atom_site_aniso_U_33
_atom_site_aniso_U_12
_atom_site_aniso_U_13
_atom_site_aniso_U_23
 Co     0.0265(5)   0.0236(5)   0.0176(5)   0.0004(4)   0.0021(4)   -0.0003(4)
 S(1)   0.050(1)    0.039(1)    0.0257(10)  0.0045(10)  0.0124(9)   0.0072(9)
 S(2)   0.043(1)    0.038(1)    0.0239(10)  0.0053(9)   0.0047(8)   -0.0065(9)
 P(1)   0.032(1)    0.048(1)    0.029(1)    0.0038(10)  -0.0016(9)  -0.0075(10)
 P(2)   0.046(1)    0.033(1)    0.029(1)    -0.011(1)   0.0062(9)   0.0009(9)
 P(3)   0.031(1)    0.031(1)    0.0236(9)   0.0033(9)   -0.0012(8)  -0.0010(8)
 P(4)   0.035(1)    0.026(1)    0.0242(10)  0.0015(9)   0.0070(8)   -0.0014(8)
 P(5)   0.048(2)    0.060(2)    0.054(2)    -0.008(1)   -0.007(1)   0.013(1)
 F(1)   0.148(8)    0.101(6)    0.30(1)     0.019(6)    -0.004(8)   0.090(8)
 F(2)   0.076(5)    0.180(9)    0.27(1)     -0.014(5)   0.027(6)    0.122(8)
 F(3)   0.159(9)    0.47(2)     0.187(10)   0.09(1)     -0.045(8)   -0.19(1)
 F(4)   0.121(7)    0.25(1)     0.207(10)   -0.064(7)   0.085(7)    0.019(9)
 F(5)   0.146(9)    0.44(2)     0.21(1)     0.08(1)     -0.066(8)   -0.24(1)
 F(6)   0.103(7)    0.178(10)   0.40(2)     0.019(6)    -0.054(8)   0.18(1)
 O      0.051(4)    0.048(4)    0.043(3)    0.015(3)    0.007(3)    -0.006(3)
 C(1)   0.058(6)    0.062(6)    0.037(5)    0.024(5)    0.000(4)    0.009(4)
 C(2)   0.045(5)    0.087(8)    0.042(5)    0.008(5)    -0.012(4)   -0.028(5)
 C(3)   0.028(4)    0.072(7)    0.059(6)    -0.001(5)   0.003(4)    -0.006(5)
 C(4)   0.041(6)    0.074(7)    0.098(8)    -0.025(5)   0.019(5)    0.001(6)
 C(5)   0.053(6)    0.066(6)    0.050(5)    -0.020(5)   0.012(4)    0.008(5)
 C(6)   0.105(8)    0.034(5)    0.050(6)    -0.021(5)   0.017(5)    -0.005(4)
 C(7)   0.088(7)    0.056(6)    0.028(5)    -0.024(5)   0.012(4)    0.006(4)
 C(8)   0.054(6)    0.042(5)    0.048(5)    0.022(4)    -0.003(4)   0.000(4)
 C(9)   0.032(4)    0.058(6)    0.044(5)    0.004(4)    0.002(4)    0.002(4)
 C(10)  0.038(4)    0.051(5)    0.024(4)    -0.004(4)   -0.007(3)   -0.004(4)
 C(11)  0.054(5)    0.041(5)    0.030(4)    -0.011(4)   -0.007(4)   -0.010(4)
 C(12)  0.052(5)    0.037(5)    0.023(4)    0.001(4)    0.002(3)    -0.008(3)
 C(13)  0.067(6)    0.025(4)    0.047(5)    -0.013(4)   0.005(4)    0.009(4)
 C(14)  0.043(5)    0.048(5)    0.050(5)    0.011(4)    0.012(4)    -0.016(4)
#------------------------------------------------------------------------------
_refine_special_details                none
_refine_ls_structure_factor_coef       F
_refine_ls_matrix_type                 full
_refine_ls_weighting_scheme            calc
_refine_ls_weighting_details
   'w = 1/[\s^2^(Fo) + 0.00010|Fo|^2^]'
_refine_ls_hydrogen_treatment          noref
_refine_ls_extinction_method           none
_refine_ls_extinction_coef             ?
_refine_ls_abs_structure_details       centrosymmetric
_refine_ls_abs_structure_Flack         ?
_refine_ls_number_reflns               3407
_refine_ls_number_parameters           262
_refine_ls_number_restraints           0
_refine_ls_number_constraints          0
_refine_ls_R_factor_gt                 0.0611
_refine_ls_wR_factor_ref               0.0628
_refine_ls_goodness_of_fit_ref         1.970
_refine_ls_shift/su_max                0.0117
_refine_ls_shift/su_mean               0.0004
_refine_diff_density_min               -0.70
_refine_diff_density_max               0.88
#------------------------------------------------------------------------------
loop_
_geom_bond_atom_site_label_1
_geom_bond_atom_site_label_2
_geom_bond_distance
_geom_bond_site_symmetry_1
_geom_bond_site_symmetry_2
_geom_bond_publ_flag
 Co        S(1)      2.299(2)   1_555 1_555 yes
 Co        S(2)      2.286(2)   1_555 1_555 yes
 Co        P(1)      2.288(2)   1_555 1_555 yes
 Co        P(2)      2.227(2)   1_555 1_555 yes
 Co        P(3)      2.312(2)   1_555 1_555 yes
 Co        P(4)      2.283(2)   1_555 1_555 yes
 S(1)      S(2)      2.027(3)   1_555 1_555 yes
 S(2)      O         1.484(5)   1_555 1_555 yes
 P(1)      C(1)      1.822(8)   1_555 1_555 yes
 P(1)      C(2)      1.833(8)   1_555 1_555 yes
 P(1)      C(3)      1.822(8)   1_555 1_555 yes
 P(2)      C(5)      1.835(9)   1_555 1_555 yes
 P(2)      C(6)      1.821(9)   1_555 1_555 yes
 P(2)      C(7)      1.835(8)   1_555 1_555 yes
 P(3)      C(8)      1.829(8)   1_555 1_555 yes
 P(3)      C(9)      1.825(8)   1_555 1_555 yes
 P(3)      C(10)     1.831(7)   1_555 1_555 yes
 P(4)      C(12)     1.836(7)   1_555 1_555 yes
 P(4)      C(13)     1.832(7)   1_555 1_555 yes
 P(4)      C(14)     1.821(8)   1_555 1_555 yes
 C(3)      C(4)      1.50(1)    1_555 1_555 yes
 C(4)      C(5)      1.51(1)    1_555 1_555 yes
 C(10)     C(11)     1.51(1)    1_555 1_555 yes
 C(11)     C(12)     1.51(1)    1_555 1_555 yes
 C(1)      H(1)      0.871      1_555 1_555 no
 C(1)      H(2)      1.035      1_555 1_555 no
 C(1)      H(3)      1.060      1_555 1_555 no
 C(2)      H(4)      1.005      1_555 1_555 no
 C(2)      H(5)      0.831      1_555 1_555 no
 C(2)      H(6)      0.992      1_555 1_555 no
 C(3)      H(7)      0.965      1_555 1_555 no
 C(3)      H(8)      0.817      1_555 1_555 no
 C(4)      H(9)      0.971      1_555 1_555 no
 C(4)      H(10)     1.087      1_555 1_555 no
 C(5)      H(11)     0.795      1_555 1_555 no
 C(5)      H(12)     0.929      1_555 1_555 no
 C(6)      H(13)     0.874      1_555 1_555 no
 C(6)      H(14)     0.865      1_555 1_555 no
 C(6)      H(15)     1.149      1_555 1_555 no
 C(7)      H(16)     0.896      1_555 1_555 no
 C(7)      H(17)     0.747      1_555 1_555 no
 C(7)      H(18)     1.149      1_555 1_555 no
 C(8)      H(19)     0.980      1_555 1_555 no
 C(8)      H(20)     0.828      1_555 1_555 no
 C(8)      H(21)     0.851      1_555 1_555 no
 C(9)      H(22)     1.028      1_555 1_555 no
 C(9)      H(23)     0.964      1_555 1_555 no
 C(9)      H(24)     0.711      1_555 1_555 no
 C(10)     H(25)     0.911      1_555 1_555 no
 C(10)     H(26)     1.002      1_555 1_555 no
 C(11)     H(27)     0.797      1_555 1_555 no
 C(11)     H(28)     1.069      1_555 1_555 no
 C(12)     H(29)     0.911      1_555 1_555 no
 C(12)     H(30)     0.941      1_555 1_555 no
 C(13)     H(31)     1.077      1_555 1_555 no
 C(13)     H(32)     1.069      1_555 1_555 no
 C(13)     H(33)     0.856      1_555 1_555 no
 C(14)     H(34)     0.786      1_555 1_555 no
 C(14)     H(35)     0.943      1_555 1_555 no
 C(14)     H(36)     0.929      1_555 1_555 no
 P(5)      F(1)      1.525(8)   1_555 1_555 yes
 P(5)      F(2)      1.531(7)   1_555 1_555 yes
 P(5)      F(3)      1.453(9)   1_555 1_555 yes
 P(5)      F(4)      1.521(7)   1_555 1_555 yes
 P(5)      F(5)      1.457(8)   1_555 1_555 yes
 P(5)      F(6)      1.489(7)   1_555 1_555 yes
#------------------------------------------------------------------------------
loop_
_geom_angle_atom_site_label_1
_geom_angle_atom_site_label_2
_geom_angle_atom_site_label_3
_geom_angle
_geom_angle_site_symmetry_1
_geom_angle_site_symmetry_2
_geom_angle_site_symmetry_3
_geom_angle_publ_flag
   S(1)      Co        S(2)      52.47(7)   1_555 1_555 1_555 yes
   S(1)      Co        P(1)      83.54(8)   1_555 1_555 1_555 yes
   S(1)      Co        P(2)      153.35(9)  1_555 1_555 1_555 yes
   S(1)      Co        P(3)      92.09(8)   1_555 1_555 1_555 yes
   S(1)      Co        P(4)      101.48(8)  1_555 1_555 1_555 yes
   S(2)      Co        P(1)      87.12(8)   1_555 1_555 1_555 yes
   S(2)      Co        P(2)      101.60(8)  1_555 1_555 1_555 yes
   S(2)      Co        P(3)      88.03(7)   1_555 1_555 1_555 yes
   S(2)      Co        P(4)      153.81(8)  1_555 1_555 1_555 yes
   P(1)      Co        P(2)      89.71(8)   1_555 1_555 1_555 yes
   P(1)      Co        P(3)      174.83(8)  1_555 1_555 1_555 yes
   P(1)      Co        P(4)      92.94(8)   1_555 1_555 1_555 yes
   P(2)      Co        P(3)      93.00(8)   1_555 1_555 1_555 yes
   P(2)      Co        P(4)      104.59(8)  1_555 1_555 1_555 yes
   P(3)      Co        P(4)      90.63(7)   1_555 1_555 1_555 yes
   Co        S(1)      S(2)      63.45(8)   1_555 1_555 1_555 yes
   Co        S(2)      S(1)      64.08(8)   1_555 1_555 1_555 yes
   Co        S(2)      O         118.1(2)   1_555 1_555 1_555 yes
   S(1)      S(2)      O         113.5(3)   1_555 1_555 1_555 yes
   Co        P(1)      C(1)      117.2(3)   1_555 1_555 1_555 yes
   Co        P(1)      C(2)      115.8(3)   1_555 1_555 1_555 yes
   Co        P(1)      C(3)      119.3(3)   1_555 1_555 1_555 yes
   C(1)      P(1)      C(2)      99.5(4)    1_555 1_555 1_555 yes
   C(1)      P(1)      C(3)      101.4(4)   1_555 1_555 1_555 yes
   C(2)      P(1)      C(3)      100.4(4)   1_555 1_555 1_555 yes
   Co        P(2)      C(5)      118.2(3)   1_555 1_555 1_555 yes
   Co        P(2)      C(6)      113.9(3)   1_555 1_555 1_555 yes
   Co        P(2)      C(7)      118.8(3)   1_555 1_555 1_555 yes
   C(5)      P(2)      C(6)      103.6(4)   1_555 1_555 1_555 yes
   C(5)      P(2)      C(7)      97.7(4)    1_555 1_555 1_555 yes
   C(6)      P(2)      C(7)      101.9(4)   1_555 1_555 1_555 yes
   Co        P(3)      C(8)      118.9(3)   1_555 1_555 1_555 yes
   Co        P(3)      C(9)      113.6(2)   1_555 1_555 1_555 yes
   Co        P(3)      C(10)     118.5(3)   1_555 1_555 1_555 yes
   C(8)      P(3)      C(9)      102.2(4)   1_555 1_555 1_555 yes
   C(8)      P(3)      C(10)     99.6(4)    1_555 1_555 1_555 yes
   C(9)      P(3)      C(10)     101.1(4)   1_555 1_555 1_555 yes
   Co        P(4)      C(12)     118.6(3)   1_555 1_555 1_555 yes
   Co        P(4)      C(13)     113.6(3)   1_555 1_555 1_555 yes
   Co        P(4)      C(14)     120.2(3)   1_555 1_555 1_555 yes
   C(12)     P(4)      C(13)     100.7(4)   1_555 1_555 1_555 yes
   C(12)     P(4)      C(14)     98.1(3)    1_555 1_555 1_555 yes
   C(13)     P(4)      C(14)     102.4(4)   1_555 1_555 1_555 yes
   P(1)      C(3)      C(4)      115.1(6)   1_555 1_555 1_555 yes
   C(3)      C(4)      C(5)      113.1(7)   1_555 1_555 1_555 yes
   P(2)      C(5)      C(4)      117.1(6)   1_555 1_555 1_555 yes
   P(3)      C(10)     C(11)     115.3(5)   1_555 1_555 1_555 yes
   C(10)     C(11)     C(12)     112.9(6)   1_555 1_555 1_555 yes
   P(4)      C(12)     C(11)     116.8(5)   1_555 1_555 1_555 yes
   P(1)      C(1)      H(1)      110.1(6)   1_555 1_555 1_555 no
   P(1)      C(1)      H(2)      122.5(6)   1_555 1_555 1_555 no
   P(1)      C(1)      H(3)      109.8(7)   1_555 1_555 1_555 no
   H(1)      C(1)      H(2)      96.1(8)    1_555 1_555 1_555 no
   H(1)      C(1)      H(3)      102.0(7)   1_555 1_555 1_555 no
   H(2)      C(1)      H(3)      113.4(7)   1_555 1_555 1_555 no
   P(1)      C(2)      H(4)      106.4(6)   1_555 1_555 1_555 no
   P(1)      C(2)      H(5)      104.4(7)   1_555 1_555 1_555 no
   P(1)      C(2)      H(6)      114.5(6)   1_555 1_555 1_555 no
   H(4)      C(2)      H(5)      129.0(10)  1_555 1_555 1_555 no
   H(4)      C(2)      H(6)      114.3(8)   1_555 1_555 1_555 no
   H(5)      C(2)      H(6)      87.7(8)    1_555 1_555 1_555 no
   P(1)      C(3)      H(7)      108.3(7)   1_555 1_555 1_555 no
   P(1)      C(3)      H(8)      120.2(8)   1_555 1_555 1_555 no
   C(4)      C(3)      H(7)      112.3(8)   1_555 1_555 1_555 no
   C(4)      C(3)      H(8)      102.9(9)   1_555 1_555 1_555 no
   H(7)      C(3)      H(8)      96.5(8)    1_555 1_555 1_555 no
   C(3)      C(4)      H(9)      106.9(9)   1_555 1_555 1_555 no
   C(3)      C(4)      H(10)     114.2(8)   1_555 1_555 1_555 no
   C(5)      C(4)      H(9)      102.0(9)   1_555 1_555 1_555 no
   C(5)      C(4)      H(10)     107.4(9)   1_555 1_555 1_555 no
   H(9)      C(4)      H(10)     112.6(8)   1_555 1_555 1_555 no
   P(2)      C(5)      H(11)     108.5(7)   1_555 1_555 1_555 no
   P(2)      C(5)      H(12)     106.7(7)   1_555 1_555 1_555 no
   C(4)      C(5)      H(11)     109.0(10)  1_555 1_555 1_555 no
   C(4)      C(5)      H(12)     101.2(8)   1_555 1_555 1_555 no
   H(11)     C(5)      H(12)     114.4(9)   1_555 1_555 1_555 no
   P(2)      C(6)      H(13)     112.8(7)   1_555 1_555 1_555 no
   P(2)      C(6)      H(14)     104.3(7)   1_555 1_555 1_555 no
   P(2)      C(6)      H(15)     108.7(6)   1_555 1_555 1_555 no
   H(13)     C(6)      H(14)     96.2(9)    1_555 1_555 1_555 no
   H(13)     C(6)      H(15)     112.0(9)   1_555 1_555 1_555 no
   H(14)     C(6)      H(15)     122.4(9)   1_555 1_555 1_555 no
   P(2)      C(7)      H(16)     106.7(7)   1_555 1_555 1_555 no
   P(2)      C(7)      H(17)     112.6(8)   1_555 1_555 1_555 no
   P(2)      C(7)      H(18)     115.2(5)   1_555 1_555 1_555 no
   H(16)     C(7)      H(17)     96.8(9)    1_555 1_555 1_555 no
   H(16)     C(7)      H(18)     120.4(8)   1_555 1_555 1_555 no
   H(17)     C(7)      H(18)     103.7(9)   1_555 1_555 1_555 no
   P(3)      C(8)      H(19)     107.0(6)   1_555 1_555 1_555 no
   P(3)      C(8)      H(20)     114.3(7)   1_555 1_555 1_555 no
   P(3)      C(8)      H(21)     114.1(7)   1_555 1_555 1_555 no
   H(19)     C(8)      H(20)     99.0(8)    1_555 1_555 1_555 no
   H(19)     C(8)      H(21)     108.6(8)   1_555 1_555 1_555 no
   H(20)     C(8)      H(21)     112.5(9)   1_555 1_555 1_555 no
   P(3)      C(9)      H(22)     110.6(6)   1_555 1_555 1_555 no
   P(3)      C(9)      H(23)     104.0(6)   1_555 1_555 1_555 no
   P(3)      C(9)      H(24)     99.0(7)    1_555 1_555 1_555 no
   H(22)     C(9)      H(23)     115.6(8)   1_555 1_555 1_555 no
   H(22)     C(9)      H(24)     101.4(8)   1_555 1_555 1_555 no
   H(23)     C(9)      H(24)     124.9(10)  1_555 1_555 1_555 no
   P(3)      C(10)     H(25)     101.5(6)   1_555 1_555 1_555 no
   P(3)      C(10)     H(26)     109.2(5)   1_555 1_555 1_555 no
   C(11)     C(10)     H(25)     111.5(7)   1_555 1_555 1_555 no
   C(11)     C(10)     H(26)     112.1(7)   1_555 1_555 1_555 no
   H(25)     C(10)     H(26)     106.3(7)   1_555 1_555 1_555 no
   C(10)     C(11)     H(27)     111.8(8)   1_555 1_555 1_555 no
   C(10)     C(11)     H(28)     112.4(7)   1_555 1_555 1_555 no
   C(12)     C(11)     H(27)     108.9(8)   1_555 1_555 1_555 no
   C(12)     C(11)     H(28)     114.0(7)   1_555 1_555 1_555 no
   H(27)     C(11)     H(28)     95.5(7)    1_555 1_555 1_555 no
   P(4)      C(12)     H(29)     105.3(6)   1_555 1_555 1_555 no
   P(4)      C(12)     H(30)     105.2(6)   1_555 1_555 1_555 no
   C(11)     C(12)     H(29)     106.3(7)   1_555 1_555 1_555 no
   C(11)     C(12)     H(30)     117.9(7)   1_555 1_555 1_555 no
   H(29)     C(12)     H(30)     104.0(7)   1_555 1_555 1_555 no
   P(4)      C(13)     H(31)     112.3(6)   1_555 1_555 1_555 no
   P(4)      C(13)     H(32)     108.8(5)   1_555 1_555 1_555 no
   P(4)      C(13)     H(33)     109.8(6)   1_555 1_555 1_555 no
   H(31)     C(13)     H(32)     117.4(7)   1_555 1_555 1_555 no
   H(31)     C(13)     H(33)     91.6(7)    1_555 1_555 1_555 no
   H(32)     C(13)     H(33)     116.1(8)   1_555 1_555 1_555 no
   P(4)      C(14)     H(34)     116.5(7)   1_555 1_555 1_555 no
   P(4)      C(14)     H(35)     114.4(6)   1_555 1_555 1_555 no
   P(4)      C(14)     H(36)     115.6(6)   1_555 1_555 1_555 no
   H(34)     C(14)     H(35)     106.0(8)   1_555 1_555 1_555 no
   H(34)     C(14)     H(36)     93.8(8)    1_555 1_555 1_555 no
   H(35)     C(14)     H(36)     108.3(8)   1_555 1_555 1_555 no
   F(1)      P(5)      F(2)      84.6(4)    1_555 1_555 1_555 yes
   F(1)      P(5)      F(3)      87.1(6)    1_555 1_555 1_555 yes
   F(1)      P(5)      F(4)      99.3(5)    1_555 1_555 1_555 yes
   F(1)      P(5)      F(5)      88.0(7)    1_555 1_555 1_555 yes
   F(1)      P(5)      F(6)      175.5(6)   1_555 1_555 1_555 yes
   F(2)      P(5)      F(3)      87.3(6)    1_555 1_555 1_555 yes
   F(2)      P(5)      F(4)      174.8(6)   1_555 1_555 1_555 yes
   F(2)      P(5)      F(5)      98.1(7)    1_555 1_555 1_555 yes
   F(2)      P(5)      F(6)      91.3(5)    1_555 1_555 1_555 yes
   F(3)      P(5)      F(4)      89.5(6)    1_555 1_555 1_555 yes
   F(3)      P(5)      F(5)      172.4(10)  1_555 1_555 1_555 yes
   F(3)      P(5)      F(6)      94.6(8)    1_555 1_555 1_555 yes
   F(4)      P(5)      F(5)      85.5(6)    1_555 1_555 1_555 yes
   F(4)      P(5)      F(6)      84.9(5)    1_555 1_555 1_555 yes
   F(5)      P(5)      F(6)      90.6(7)    1_555 1_555 1_555 yes

#===END

data_4BF4
#------------------------------------------------------------------------------
_audit_creation_date                  'Wed Jul 22 09:32:43 1998'
_audit_creation_method                'from TEXRAY.INF file'
_audit_update_record                   ?
#------------------------------------------------------------------------------
_computing_data_collection            'MSC/AFC Diffractometer Control'
_computing_cell_refinement            'MSC/AFC Diffractometer Control'
_computing_data_reduction             'teXsan'
_computing_structure_solution         'SHELXS86'
_computing_structure_refinement       'teXsan'
_computing_publication_material       'teXsan'
_computing_molecular_graphics         'teXsan ORTEP'
#------------------------------------------------------------------------------
_chemical_compound_source
;
Recrystalized from acetone/diethyl ether
;
_chemical_name_systematic
;
Bis{1,3-bis(dimethylphosphino)propane}{diselenido(2-)}cobalt(III)
tetrafluoroborate
;
_chemical_name_common                  [Co(Se~2~)(dmpp)~2~]BF~4~
_chemical_formula_weight               631.99
_chemical_formula_analytical           'C14 H36 B Co F4 P4 Se2'
_chemical_formula_sum                  'C14 H36 B Co F4 P4 Se2'
_chemical_formula_moiety               'C14 H36 Co P4 Se2 1+, B F4 1-'
_chemical_formula_structural           '(Co (C7 H18 P2)2 (Se2)), (B F4)'
_chemical_melting_point                'not measured'
#------------------------------------------------------------------------------
_cell_length_a                         9.631(4)
_cell_length_b                         8.934(3)
_cell_length_c                         28.377(3)
_cell_angle_alpha                      90
_cell_angle_beta                       97.32(2)
_cell_angle_gamma                      90
_cell_volume                           2421(1)
_cell_formula_units_Z                  4
_cell_measurement_temperature          296.2
_cell_measurement_reflns_used          25
_cell_measurement_theta_min            14.7
_cell_measurement_theta_max            15.0
#------------------------------------------------------------------------------
_symmetry_cell_setting                 monoclinic
_symmetry_space_group_name_H-M        'P 21/c'
_symmetry_Int_Tables_number            14
_symmetry_space_group_name_Hall        ?
loop_
_symmetry_equiv_pos_as_xyz
x,y,z
-x,1/2+y,1/2-z
-x,-y,-z
x,1/2-y,1/2+z
#------------------------------------------------------------------------------
_exptl_crystal_description            'column'
_exptl_crystal_colour                 'purple'
_exptl_crystal_size_max                0.480
_exptl_crystal_size_mid                0.320
_exptl_crystal_size_min                0.240
_exptl_crystal_density_diffrn          1.733
_exptl_crystal_density_method         'not measured'
_exptl_crystal_F_000                   1264.00
_exptl_absorpt_coefficient_mu          4.009
_exptl_absorpt_correction_type         integration
_exptl_absorpt_process_details         Coppens_numerical
_exptl_absorpt_correction_T_min        0.284
_exptl_absorpt_correction_T_max        0.420
_exptl_special_details                 none
#------------------------------------------------------------------------------
_diffrn_ambient_temperature            296.2
_diffrn_radiation_wavelength           0.7107
_diffrn_radiation_type                'Mo K\a'
_diffrn_radiation_source              'Rigaku rotating anode'
_diffrn_radiation_monochromator       'graphite'
_diffrn_radiation_detector            'scintillation counter'
_diffrn_measurement_device_type       'Rigaku AFC5R'
_diffrn_measurement_method             \w

_diffrn_standards_number              3
_diffrn_standards_interval_count      150
_diffrn_standards_decay_%             -1.48
loop_
_diffrn_standard_refln_index_h
_diffrn_standard_refln_index_k
_diffrn_standard_refln_index_l
      2       0     -6
      1       1     -3
      1       0     -6
_diffrn_reflns_number                  7471
_reflns_number_total                   7086
_reflns_number_gt                      3291
_reflns_observed_expression            'I > 3\s(I)'
_diffrn_reflns_av_R_equivalents        0.034
_diffrn_reflns_av_sigmaI/netI          0.097
_diffrn_reflns_limit_h_min             0
_diffrn_reflns_limit_h_max             13
_diffrn_reflns_limit_k_min             0
_diffrn_reflns_limit_k_max             12
_diffrn_reflns_limit_l_min             -39
_diffrn_reflns_limit_l_max             39
_diffrn_reflns_theta_min               1.45
_diffrn_reflns_theta_max               30.01
_diffrn_reflns_reduction_process      'Lp corrections applied'
#------------------------------------------------------------------------------
loop_
_atom_type_symbol
_atom_type_description
_atom_type_scat_dispersion_real
_atom_type_scat_imag
_atom_type_scat_source
  'Se' 'Se'   -0.093 2.226
;International Tables for Crystallography
(1992, Vol. C, Tables 4.2.6.8 and 6.1.1.1)
;
  'Co' 'Co'   0.349 0.972
;International Tables for Crystallography
(1992, Vol. C, Tables 4.2.6.8 and 6.1.1.1)
;
  'P'  'P'   0.102 0.094
;International Tables for Crystallography
(1992, Vol. C, Tables 4.2.6.8 and 6.1.1.1)
;
  'F'  'F'   0.017 0.010
;International Tables for Crystallography
(1992, Vol. C, Tables 4.2.6.8 and 6.1.1.1)
;
  'C'  'C'   0.003 0.002
;International Tables for Crystallography
(1992, Vol. C, Tables 4.2.6.8 and 6.1.1.1)
;
  'B'  'B'   0.001 0.001
;International Tables for Crystallography
(1992, Vol. C, Tables 4.2.6.8 and 6.1.1.1)
;
  'H'  'H'   0.000 0.000
;International Tables for Crystallography
(1992, Vol. C, Table 6.1.1.2)
;
#------------------------------------------------------------------------------
loop_
_atom_site_label
_atom_site_type_symbol
_atom_site_fract_x
_atom_site_fract_y
_atom_site_fract_z
_atom_site_U_iso_or_equiv
_atom_site_adp_type
_atom_site_occupancy
_atom_site_calc_flags
_atom_site_refinement_flags
_atom_site_disorder_assembly
_atom_site_disorder_group
 Se(1)  Se 0.13813(7)  1.01731(6)  0.36031(2)  0.0533(2)   Uani 1.00 d . . .
 Se(2)  Se -0.00186(6) 0.82985(7)  0.32538(2)  0.0482(2)   Uani 1.00 d . . .
 Co     Co 0.23145(7)  0.76609(7)  0.36234(2)  0.0287(2)   Uani 1.00 d . . .
 P(1)   P  0.1611(2)   0.7724(2)   0.43663(5)  0.0457(4)   Uani 1.00 d . . .
 P(2)   P  0.2161(1)   0.5167(1)   0.36008(5)  0.0337(4)   Uani 1.00 d . . .
 P(3)   P  0.2785(1)   0.7833(1)   0.28529(5)  0.0356(4)   Uani 1.00 d . . .
 P(4)   P  0.4558(1)   0.8089(2)   0.38979(5)  0.0417(4)   Uani 1.00 d . . .
 F(1)   F  0.6023(3)   0.3356(4)   0.4218(1)   0.070(1)    Uani 1.00 d . . .
 F(2)   F  0.7852(4)   0.4710(5)   0.4066(2)   0.102(2)    Uani 1.00 d . . .
 F(3)   F  0.8041(4)   0.2249(4)   0.4110(1)   0.094(2)    Uani 1.00 d . . .
 F(4)   F  0.6704(4)   0.3272(6)   0.3497(1)   0.122(2)    Uani 1.00 d . . .
 C(1)   C  0.2309(7)   0.9213(7)   0.4774(2)   0.072(2)    Uani 1.00 d . . .
 C(2)   C  -0.0261(6)  0.7919(7)   0.4395(2)   0.068(2)    Uani 1.00 d . . .
 C(3)   C  0.1998(6)   0.6094(7)   0.4756(2)   0.058(2)    Uani 1.00 d . . .
 C(4)   C  0.1586(6)   0.4581(7)   0.4544(2)   0.059(2)    Uani 1.00 d . . .
 C(5)   C  0.2465(6)   0.4132(6)   0.4159(2)   0.048(2)    Uani 1.00 d . . .
 C(6)   C  0.3287(6)   0.4076(6)   0.3266(2)   0.054(2)    Uani 1.00 d . . .
 C(7)   C  0.0434(6)   0.4495(6)   0.3356(2)   0.053(2)    Uani 1.00 d . . .
 C(8)   C  0.2651(6)   0.9709(6)   0.2592(2)   0.052(2)    Uani 1.00 d . . .
 C(9)   C  0.1744(6)   0.6720(6)   0.2396(2)   0.048(2)    Uani 1.00 d . . .
 C(10)  C  0.4549(5)   0.7327(6)   0.2720(2)   0.051(2)    Uani 1.00 d . . .
 C(11)  C  0.5750(6)   0.8085(7)   0.3022(2)   0.063(2)    Uani 1.00 d . . .
 C(12)  C  0.5918(5)   0.7519(7)   0.3533(2)   0.061(2)    Uani 1.00 d . . .
 C(13)  C  0.5333(6)   0.7256(7)   0.4461(2)   0.062(2)    Uani 1.00 d . . .
 C(14)  C  0.4968(6)   1.0069(7)   0.3986(2)   0.077(2)    Uani 1.00 d . . .
 B      B  0.7152(7)   0.3359(9)   0.3962(3)   0.053(2)    Uani 1.00 d . . .
 H(1)   H  0.3317      0.9222      0.4877      0.0820      Uiso 1.00 d . . .
 H(2)   H  0.1951      1.0142      0.4659      0.0820      Uiso 1.00 d . . .
 H(3)   H  0.1813      0.9033      0.5034      0.0820      Uiso 1.00 d . . .
 H(4)   H  -0.0625     0.8756      0.4232      0.0752      Uiso 1.00 d . . .
 H(5)   H  -0.0363     0.7930      0.4757      0.0752      Uiso 1.00 d . . .
 H(6)   H  -0.0752     0.7060      0.4249      0.0752      Uiso 1.00 d . . .
 H(7)   H  0.1458      0.6258      0.4991      0.0693      Uiso 1.00 d . . .
 H(8)   H  0.3051      0.6069      0.4847      0.0693      Uiso 1.00 d . . .
 H(9)   H  0.1644      0.3789      0.4788      0.0693      Uiso 1.00 d . . .
 H(10)  H  0.0617      0.4619      0.4423      0.0693      Uiso 1.00 d . . .
 H(11)  H  0.3410      0.4217      0.4301      0.0693      Uiso 1.00 d . . .
 H(12)  H  0.2311      0.3139      0.4071      0.0693      Uiso 1.00 d . . .
 H(13)  H  0.4089      0.4144      0.3381      0.0584      Uiso 1.00 d . . .
 H(14)  H  0.3202      0.4274      0.2941      0.0584      Uiso 1.00 d . . .
 H(15)  H  0.3028      0.2945      0.3295      0.0584      Uiso 1.00 d . . .
 H(16)  H  0.0332      0.4695      0.3005      0.0629      Uiso 1.00 d . . .
 H(17)  H  0.0424      0.3447      0.3384      0.0629      Uiso 1.00 d . . .
 H(18)  H  -0.0236     0.4971      0.3524      0.0629      Uiso 1.00 d . . .
 H(19)  H  0.1769      1.0160      0.2617      0.0693      Uiso 1.00 d . . .
 H(20)  H  0.3356      1.0401      0.2774      0.0693      Uiso 1.00 d . . .
 H(21)  H  0.2807      0.9631      0.2280      0.0693      Uiso 1.00 d . . .
 H(22)  H  0.2052      0.7000      0.2111      0.0693      Uiso 1.00 d . . .
 H(23)  H  0.1814      0.5706      0.2488      0.0693      Uiso 1.00 d . . .
 H(24)  H  0.0793      0.7021      0.2388      0.0693      Uiso 1.00 d . . .
 H(25)  H  0.4650      0.6246      0.2744      0.0693      Uiso 1.00 d . . .
 H(26)  H  0.4613      0.7508      0.2406      0.0693      Uiso 1.00 d . . .
 H(27)  H  0.6627      0.7894      0.2880      0.0693      Uiso 1.00 d . . .
 H(28)  H  0.5626      0.9267      0.3041      0.0693      Uiso 1.00 d . . .
 H(29)  H  0.6811      0.7810      0.3704      0.0693      Uiso 1.00 d . . .
 H(30)  H  0.5966      0.6444      0.3521      0.0693      Uiso 1.00 d . . .
 H(31)  H  0.4801      0.7633      0.4740      0.0693      Uiso 1.00 d . . .
 H(32)  H  0.6220      0.7528      0.4528      0.0693      Uiso 1.00 d . . .
 H(33)  H  0.5445      0.6199      0.4413      0.0693      Uiso 1.00 d . . .
 H(34)  H  0.4420      1.0475      0.4188      0.0806      Uiso 1.00 d . . .
 H(35)  H  0.5909      1.0170      0.4126      0.0806      Uiso 1.00 d . . .
 H(36)  H  0.4789      1.0667      0.3685      0.0806      Uiso 1.00 d . . .

loop_
_atom_site_aniso_label
_atom_site_aniso_U_11
_atom_site_aniso_U_22
_atom_site_aniso_U_33
_atom_site_aniso_U_12
_atom_site_aniso_U_13
_atom_site_aniso_U_23
 Se(1)  0.0642(4)   0.0301(3)   0.0660(4)   0.0058(3)   0.0094(3)   -0.0021(3)
 Se(2)  0.0345(3)   0.0488(3)   0.0596(4)   0.0051(3)   -0.0003(3)  0.0059(3)
 Co     0.0289(4)   0.0262(3)   0.0302(4)   -0.0018(3)  0.0012(3)   -0.0001(3)
 P(1)   0.0544(10)  0.0492(9)   0.0352(8)   -0.0035(8)  0.0117(7)   -0.0055(7)
 P(2)   0.0362(8)   0.0275(7)   0.0359(7)   -0.0028(6)  -0.0011(6)  0.0007(6)
 P(3)   0.0348(7)   0.0397(8)   0.0320(8)   -0.0028(6)  0.0029(6)   0.0040(6)
 P(4)   0.0361(8)   0.0420(9)   0.0439(9)   -0.0096(7)  -0.0069(7)  0.0020(7)
 F(1)   0.055(2)    0.090(3)    0.066(2)    -0.016(2)   0.018(2)    -0.018(2)
 F(2)   0.078(3)    0.085(3)    0.144(4)    -0.022(2)   0.023(3)    0.014(3)
 F(3)   0.092(3)    0.096(3)    0.095(3)    0.039(3)    0.014(2)    0.018(2)
 F(4)   0.097(3)    0.230(6)    0.037(2)    0.038(4)    0.005(2)    -0.010(3)
 C(1)   0.095(5)    0.067(4)    0.054(4)    -0.010(4)   0.012(4)    -0.027(3)
 C(2)   0.060(4)    0.081(5)    0.069(4)    0.006(4)    0.033(4)    -0.001(4)
 C(3)   0.065(4)    0.070(4)    0.041(4)    -0.006(3)   0.013(3)    0.002(3)
 C(4)   0.074(4)    0.062(4)    0.041(4)    -0.017(4)   0.006(3)    0.017(3)
 C(5)   0.061(4)    0.035(3)    0.045(4)    -0.004(3)   -0.002(3)   0.009(3)
 C(6)   0.064(4)    0.042(3)    0.055(4)    0.010(3)    0.006(3)    0.002(3)
 C(7)   0.059(4)    0.035(3)    0.060(4)    -0.014(3)   -0.010(3)   0.001(3)
 C(8)   0.067(4)    0.046(3)    0.044(3)    -0.002(3)   0.009(3)    0.016(3)
 C(9)   0.057(4)    0.053(3)    0.033(3)    -0.008(3)   -0.002(3)   0.002(3)
 C(10)  0.042(3)    0.071(4)    0.044(3)    0.004(3)    0.017(3)    0.005(3)
 C(11)  0.037(3)    0.089(5)    0.065(4)    -0.004(3)   0.015(3)    0.010(4)
 C(12)  0.029(3)    0.083(5)    0.071(4)    -0.002(3)   0.000(3)    0.008(4)
 C(13)  0.051(4)    0.073(4)    0.058(4)    0.002(3)    -0.014(3)   0.010(3)
 C(14)  0.067(5)    0.056(4)    0.100(5)    -0.021(4)   -0.018(4)   -0.002(4)
 B      0.045(4)    0.065(5)    0.050(4)    -0.004(4)   0.003(3)    -0.002(4)
#------------------------------------------------------------------------------
_refine_special_details                none
_refine_ls_structure_factor_coef       F
_refine_ls_matrix_type                 full
_refine_ls_weighting_scheme            calc
_refine_ls_weighting_details
   'w = 1/[\s^2^(Fo) + 0.00010|Fo|^2^]'
_refine_ls_hydrogen_treatment          noref
_refine_ls_extinction_method           none
_refine_ls_extinction_coef             ?
_refine_ls_abs_structure_details       centrosymmetric
_refine_ls_abs_structure_Flack         ?
_refine_ls_number_reflns               3291
_refine_ls_number_parameters           235
_refine_ls_number_restraints           0
_refine_ls_number_constraints          0
_refine_ls_R_factor_gt                 0.0410
_refine_ls_wR_factor_ref               0.0346
_refine_ls_goodness_of_fit_ref         1.376
_refine_ls_shift/su_max                0.0007
_refine_ls_shift/su_mean               0.0000
_refine_diff_density_min               -0.48
_refine_diff_density_max               0.73
#------------------------------------------------------------------------------
loop_
_geom_bond_atom_site_label_1
_geom_bond_atom_site_label_2
_geom_bond_distance
_geom_bond_site_symmetry_1
_geom_bond_site_symmetry_2
_geom_bond_publ_flag
 Se(1)     Se(2)     2.2944(9)  1_555 1_555 yes
 Se(1)     Co        2.4156(8)  1_555 1_555 yes
 Se(2)     Co        2.423(1)   1_555 1_555 yes
 Co        P(1)      2.296(2)   1_555 1_555 yes
 Co        P(2)      2.233(1)   1_555 1_555 yes
 Co        P(3)      2.294(2)   1_555 1_555 yes
 Co        P(4)      2.234(2)   1_555 1_555 yes
 P(1)      C(1)      1.833(6)   1_555 1_555 yes
 P(1)      C(2)      1.823(6)   1_555 1_555 yes
 P(1)      C(3)      1.839(6)   1_555 1_555 yes
 P(2)      C(5)      1.825(5)   1_555 1_555 yes
 P(2)      C(6)      1.814(5)   1_555 1_555 yes
 P(2)      C(7)      1.821(5)   1_555 1_555 yes
 P(3)      C(8)      1.830(5)   1_555 1_555 yes
 P(3)      C(9)      1.828(5)   1_555 1_555 yes
 P(3)      C(10)     1.843(5)   1_555 1_555 yes
 P(4)      C(12)     1.842(6)   1_555 1_555 yes
 P(4)      C(13)     1.833(6)   1_555 1_555 yes
 P(4)      C(14)     1.823(6)   1_555 1_555 yes
 C(3)      C(4)      1.512(8)   1_555 1_555 yes
 C(4)      C(5)      1.518(8)   1_555 1_555 yes
 C(10)     C(11)     1.510(8)   1_555 1_555 yes
 C(11)     C(12)     1.524(8)   1_555 1_555 yes
 C(1)      H(1)      0.977      1_555 1_555 no
 C(1)      H(2)      0.941      1_555 1_555 no
 C(1)      H(3)      0.943      1_555 1_555 no
 C(2)      H(4)      0.923      1_555 1_555 no
 C(2)      H(5)      1.046      1_555 1_555 no
 C(2)      H(6)      0.966      1_555 1_555 no
 C(3)      H(7)      0.909      1_555 1_555 no
 C(3)      H(8)      1.015      1_555 1_555 no
 C(4)      H(9)      0.988      1_555 1_555 no
 C(4)      H(10)     0.952      1_555 1_555 no
 C(5)      H(11)     0.950      1_555 1_555 no
 C(5)      H(12)     0.928      1_555 1_555 no
 C(6)      H(13)     0.801      1_555 1_555 no
 C(6)      H(14)     0.933      1_555 1_555 no
 C(6)      H(15)     1.047      1_555 1_555 no
 C(7)      H(16)     1.004      1_555 1_555 no
 C(7)      H(17)     0.939      1_555 1_555 no
 C(7)      H(18)     0.950      1_555 1_555 no
 C(8)      H(19)     0.951      1_555 1_555 no
 C(8)      H(20)     1.012      1_555 1_555 no
 C(8)      H(21)     0.919      1_555 1_555 no
 C(9)      H(22)     0.933      1_555 1_555 no
 C(9)      H(23)     0.942      1_555 1_555 no
 C(9)      H(24)     0.952      1_555 1_555 no
 C(10)     H(25)     0.973      1_555 1_555 no
 C(10)     H(26)     0.914      1_555 1_555 no
 C(11)     H(27)     0.996      1_555 1_555 no
 C(11)     H(28)     1.064      1_555 1_555 no
 C(12)     H(29)     0.967      1_555 1_555 no
 C(12)     H(30)     0.963      1_555 1_555 no
 C(13)     H(31)     1.052      1_555 1_555 no
 C(13)     H(32)     0.885      1_555 1_555 no
 C(13)     H(33)     0.963      1_555 1_555 no
 C(14)     H(34)     0.902      1_555 1_555 no
 C(14)     H(35)     0.946      1_555 1_555 no
 C(14)     H(36)     1.004      1_555 1_555 no
 F(1)      B         1.380(7)   1_555 1_555 yes
 F(2)      B         1.396(8)   1_555 1_555 yes
 F(3)      B         1.342(8)   1_555 1_555 yes
 F(4)      B         1.339(7)   1_555 1_555 yes
#------------------------------------------------------------------------------
loop_
_geom_angle_atom_site_label_1
_geom_angle_atom_site_label_2
_geom_angle_atom_site_label_3
_geom_angle
_geom_angle_site_symmetry_1
_geom_angle_site_symmetry_2
_geom_angle_site_symmetry_3
_geom_angle_publ_flag
   Se(2)     Se(1)     Co        61.86(3)   1_555 1_555 1_555 yes
   Se(1)     Se(2)     Co        61.53(3)   1_555 1_555 1_555 yes
   Se(1)     Co        Se(2)     56.61(2)   1_555 1_555 1_555 yes
   Se(1)     Co        P(1)      81.17(5)   1_555 1_555 1_555 yes
   Se(1)     Co        P(2)      154.57(5)  1_555 1_555 1_555 yes
   Se(1)     Co        P(3)      91.89(4)   1_555 1_555 1_555 yes
   Se(1)     Co        P(4)      100.92(5)  1_555 1_555 1_555 yes
   Se(2)     Co        P(1)      91.47(5)   1_555 1_555 1_555 yes
   Se(2)     Co        P(2)      99.65(4)   1_555 1_555 1_555 yes
   Se(2)     Co        P(3)      81.76(4)   1_555 1_555 1_555 yes
   Se(2)     Co        P(4)      155.88(5)  1_555 1_555 1_555 yes
   P(1)      Co        P(2)      91.42(6)   1_555 1_555 1_555 yes
   P(1)      Co        P(3)      172.24(6)  1_555 1_555 1_555 yes
   P(1)      Co        P(4)      93.51(6)   1_555 1_555 1_555 yes
   P(2)      Co        P(3)      93.44(5)   1_555 1_555 1_555 yes
   P(2)      Co        P(4)      103.80(6)  1_555 1_555 1_555 yes
   P(3)      Co        P(4)      91.20(6)   1_555 1_555 1_555 yes
   Co        P(1)      C(1)      118.0(2)   1_555 1_555 1_555 yes
   Co        P(1)      C(2)      116.9(2)   1_555 1_555 1_555 yes
   Co        P(1)      C(3)      118.2(2)   1_555 1_555 1_555 yes
   C(1)      P(1)      C(2)      100.9(3)   1_555 1_555 1_555 yes
   C(1)      P(1)      C(3)      99.5(3)    1_555 1_555 1_555 yes
   C(2)      P(1)      C(3)      100.1(3)   1_555 1_555 1_555 yes
   Co        P(2)      C(5)      118.6(2)   1_555 1_555 1_555 yes
   Co        P(2)      C(6)      120.6(2)   1_555 1_555 1_555 yes
   Co        P(2)      C(7)      113.2(2)   1_555 1_555 1_555 yes
   C(5)      P(2)      C(6)      98.1(2)    1_555 1_555 1_555 yes
   C(5)      P(2)      C(7)      101.6(2)   1_555 1_555 1_555 yes
   C(6)      P(2)      C(7)      101.6(3)   1_555 1_555 1_555 yes
   Co        P(3)      C(8)      115.8(2)   1_555 1_555 1_555 yes
   Co        P(3)      C(9)      118.8(2)   1_555 1_555 1_555 yes
   Co        P(3)      C(10)     118.6(2)   1_555 1_555 1_555 yes
   C(8)      P(3)      C(9)      102.0(2)   1_555 1_555 1_555 yes
   C(8)      P(3)      C(10)     99.3(3)    1_555 1_555 1_555 yes
   C(9)      P(3)      C(10)     99.1(3)    1_555 1_555 1_555 yes
   Co        P(4)      C(12)     118.8(2)   1_555 1_555 1_555 yes
   Co        P(4)      C(13)     120.2(2)   1_555 1_555 1_555 yes
   Co        P(4)      C(14)     113.4(2)   1_555 1_555 1_555 yes
   C(12)     P(4)      C(13)     97.9(3)    1_555 1_555 1_555 yes
   C(12)     P(4)      C(14)     100.9(3)   1_555 1_555 1_555 yes
   C(13)     P(4)      C(14)     102.5(3)   1_555 1_555 1_555 yes
   P(1)      C(3)      C(4)      116.5(4)   1_555 1_555 1_555 yes
   C(3)      C(4)      C(5)      112.4(5)   1_555 1_555 1_555 yes
   P(2)      C(5)      C(4)      116.6(4)   1_555 1_555 1_555 yes
   P(3)      C(10)     C(11)     115.7(4)   1_555 1_555 1_555 yes
   C(10)     C(11)     C(12)     111.8(5)   1_555 1_555 1_555 yes
   P(4)      C(12)     C(11)     116.5(4)   1_555 1_555 1_555 yes
   P(1)      C(1)      H(1)      117.8(5)   1_555 1_555 1_555 no
   P(1)      C(1)      H(2)      109.4(5)   1_555 1_555 1_555 no
   P(1)      C(1)      H(3)      100.8(5)   1_555 1_555 1_555 no
   H(1)      C(1)      H(2)      113.8(6)   1_555 1_555 1_555 no
   H(1)      C(1)      H(3)      110.5(6)   1_555 1_555 1_555 no
   H(2)      C(1)      H(3)      102.7(6)   1_555 1_555 1_555 no
   P(1)      C(2)      H(4)      111.7(5)   1_555 1_555 1_555 no
   P(1)      C(2)      H(5)      105.1(4)   1_555 1_555 1_555 no
   P(1)      C(2)      H(6)      109.8(4)   1_555 1_555 1_555 no
   H(4)      C(2)      H(5)      114.0(6)   1_555 1_555 1_555 no
   H(4)      C(2)      H(6)      107.2(6)   1_555 1_555 1_555 no
   H(5)      C(2)      H(6)      109.0(5)   1_555 1_555 1_555 no
   P(1)      C(3)      H(7)      102.9(5)   1_555 1_555 1_555 no
   P(1)      C(3)      H(8)      106.8(4)   1_555 1_555 1_555 no
   C(4)      C(3)      H(7)      107.0(5)   1_555 1_555 1_555 no
   C(4)      C(3)      H(8)      106.5(5)   1_555 1_555 1_555 no
   H(7)      C(3)      H(8)      117.7(6)   1_555 1_555 1_555 no
   C(3)      C(4)      H(9)      111.8(5)   1_555 1_555 1_555 no
   C(3)      C(4)      H(10)     107.8(6)   1_555 1_555 1_555 no
   C(5)      C(4)      H(9)      109.2(5)   1_555 1_555 1_555 no
   C(5)      C(4)      H(10)     111.2(5)   1_555 1_555 1_555 no
   H(9)      C(4)      H(10)     104.1(5)   1_555 1_555 1_555 no
   P(2)      C(5)      H(11)     111.6(4)   1_555 1_555 1_555 no
   P(2)      C(5)      H(12)     104.5(4)   1_555 1_555 1_555 no
   C(4)      C(5)      H(11)     105.3(5)   1_555 1_555 1_555 no
   C(4)      C(5)      H(12)     111.1(5)   1_555 1_555 1_555 no
   H(11)     C(5)      H(12)     107.6(5)   1_555 1_555 1_555 no
   P(2)      C(6)      H(13)     111.0(5)   1_555 1_555 1_555 no
   P(2)      C(6)      H(14)     115.7(4)   1_555 1_555 1_555 no
   P(2)      C(6)      H(15)     108.3(4)   1_555 1_555 1_555 no
   H(13)     C(6)      H(14)     110.2(6)   1_555 1_555 1_555 no
   H(13)     C(6)      H(15)     105.5(5)   1_555 1_555 1_555 no
   H(14)     C(6)      H(15)     105.6(5)   1_555 1_555 1_555 no
   P(2)      C(7)      H(16)     106.7(4)   1_555 1_555 1_555 no
   P(2)      C(7)      H(17)     108.4(4)   1_555 1_555 1_555 no
   P(2)      C(7)      H(18)     107.8(4)   1_555 1_555 1_555 no
   H(16)     C(7)      H(17)     105.0(5)   1_555 1_555 1_555 no
   H(16)     C(7)      H(18)     115.6(5)   1_555 1_555 1_555 no
   H(17)     C(7)      H(18)     112.9(5)   1_555 1_555 1_555 no
   P(3)      C(8)      H(19)     112.0(4)   1_555 1_555 1_555 no
   P(3)      C(8)      H(20)     110.1(4)   1_555 1_555 1_555 no
   P(3)      C(8)      H(21)     108.0(4)   1_555 1_555 1_555 no
   H(19)     C(8)      H(20)     104.4(5)   1_555 1_555 1_555 no
   H(19)     C(8)      H(21)     111.3(5)   1_555 1_555 1_555 no
   H(20)     C(8)      H(21)     111.0(5)   1_555 1_555 1_555 no
   P(3)      C(9)      H(22)     105.3(4)   1_555 1_555 1_555 no
   P(3)      C(9)      H(23)     108.3(4)   1_555 1_555 1_555 no
   P(3)      C(9)      H(24)     107.7(4)   1_555 1_555 1_555 no
   H(22)     C(9)      H(23)     118.6(6)   1_555 1_555 1_555 no
   H(22)     C(9)      H(24)     108.2(5)   1_555 1_555 1_555 no
   H(23)     C(9)      H(24)     108.3(5)   1_555 1_555 1_555 no
   P(3)      C(10)     H(25)     108.4(4)   1_555 1_555 1_555 no
   P(3)      C(10)     H(26)     109.5(4)   1_555 1_555 1_555 no
   C(11)     C(10)     H(25)     110.1(5)   1_555 1_555 1_555 no
   C(11)     C(10)     H(26)     109.3(5)   1_555 1_555 1_555 no
   H(25)     C(10)     H(26)     103.1(5)   1_555 1_555 1_555 no
   C(10)     C(11)     H(27)     108.7(5)   1_555 1_555 1_555 no
   C(10)     C(11)     H(28)     113.0(5)   1_555 1_555 1_555 no
   C(12)     C(11)     H(27)     109.6(5)   1_555 1_555 1_555 no
   C(12)     C(11)     H(28)     106.3(5)   1_555 1_555 1_555 no
   H(27)     C(11)     H(28)     107.2(5)   1_555 1_555 1_555 no
   P(4)      C(12)     H(29)     107.1(5)   1_555 1_555 1_555 no
   P(4)      C(12)     H(30)     109.7(4)   1_555 1_555 1_555 no
   C(11)     C(12)     H(29)     111.5(5)   1_555 1_555 1_555 no
   C(11)     C(12)     H(30)     107.3(6)   1_555 1_555 1_555 no
   H(29)     C(12)     H(30)     104.0(5)   1_555 1_555 1_555 no
   P(4)      C(13)     H(31)     110.1(4)   1_555 1_555 1_555 no
   P(4)      C(13)     H(32)     110.6(5)   1_555 1_555 1_555 no
   P(4)      C(13)     H(33)     108.3(4)   1_555 1_555 1_555 no
   H(31)     C(13)     H(32)     107.3(6)   1_555 1_555 1_555 no
   H(31)     C(13)     H(33)     119.7(6)   1_555 1_555 1_555 no
   H(32)     C(13)     H(33)     100.3(5)   1_555 1_555 1_555 no
   P(4)      C(14)     H(34)     110.1(5)   1_555 1_555 1_555 no
   P(4)      C(14)     H(35)     109.2(5)   1_555 1_555 1_555 no
   P(4)      C(14)     H(36)     112.9(5)   1_555 1_555 1_555 no
   H(34)     C(14)     H(35)     107.6(6)   1_555 1_555 1_555 no
   H(34)     C(14)     H(36)     106.0(6)   1_555 1_555 1_555 no
   H(35)     C(14)     H(36)     110.9(6)   1_555 1_555 1_555 no
   F(1)      B         F(2)      106.5(5)   1_555 1_555 1_555 yes
   F(1)      B         F(3)      110.4(6)   1_555 1_555 1_555 yes
   F(1)      B         F(4)      110.0(5)   1_555 1_555 1_555 yes
   F(2)      B         F(3)      107.6(5)   1_555 1_555 1_555 yes
   F(2)      B         F(4)      110.1(6)   1_555 1_555 1_555 yes
   F(3)      B         F(4)      112.2(6)   1_555 1_555 1_555 yes

#===END
